# Supplementary material for: G-rich VEGF aptamer with locked and unlocked nucleic acid modifications exhibits a unique G-quadruplex fold
Source: PubMed Central journal article supplement — Nucleic Acids Res. 2013 Aug 8;41(20):9524–36. doi: 10.1093/nar/gkt697 (PMC3814366; doi:10.1093/nar/gkt697), 2013-08-08
Supplement: supp_gkt697_nar-01612-f-2013-File009.pdf [file supp_gkt697_nar-01612-f-2013-File009.pdf]

## Supplementary information

### **G-rich VEGF aptamer with locked and unlocked nucleic acid modifications exhibits a unique G-quadruplex fold**

Maja Marušič<sup>1</sup>, Rakesh N. Veedu<sup>2,\*</sup>, Jesper Wengel<sup>3</sup> and Janez Plavec<sup>1,4,5,\*</sup>

<sup>1</sup> Slovenian NMR Center, National Institute of Chemistry, Hajdrihova 19, SI-1000 Ljubljana, Slovenia

<sup>2</sup> School of Chemistry & Molecular Biosciences, University of Queensland, St Lucia, Brisbane, 4072 Australia

<sup>3</sup> Nucleic Acid Center, Department of Physics, Chemistry and Pharmacy, University of Southern Denmark, 5230 Odense M, Denmark

<sup>4</sup> EN-FIST Center of Excellence, SI-1000 Ljubljana, Slovenia

<sup>5</sup> Faculty of Chemistry and Chemical Technology, University of Ljubljana, SI-1000 Ljubljana, Slovenia

## Supplementary Figures

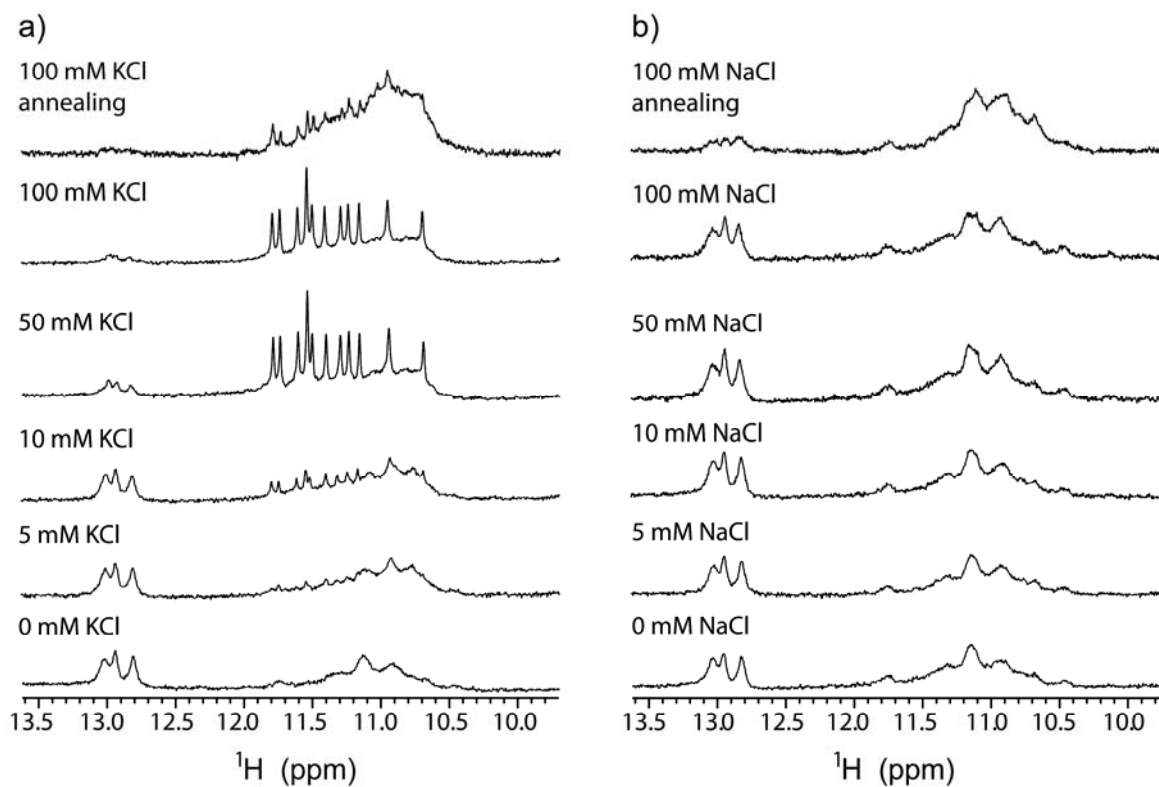

**Figure S1:** The imino region of the 1D  $^1\text{H}$  NMR spectra of RNV66 recorded at different concentrations of a)  $\text{K}^+$  and b)  $\text{Na}^+$  ions and after fast annealing. Spectra were recorded at 600 MHz, 25 °C in 10%  $^2\text{H}_2\text{O}$ , 10 mM TE buffer with pH 7 and oligonucleotide concentration of 1.0 mM.

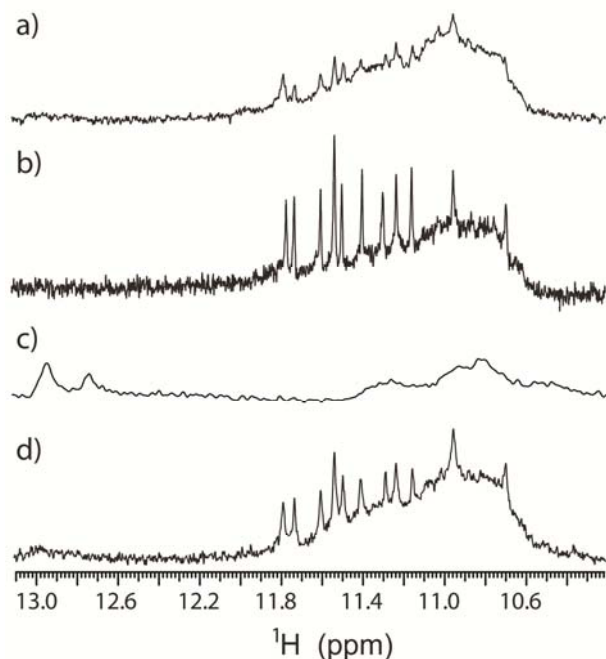

**Figure S2:** The imino region of 1D  $^1\text{H}$  NMR spectra of RNV66 recorded after a) fast annealing, b) slow annealing with dilution from 1 to 0.5 mM oligonucleotide concentration c) after removal of  $\text{K}^+$  ions and d) upon increase of  $\text{K}^+$  ions concentration to 100 mM in a single step. Spectra were recorded at 600 MHz (a and d) or 800 MHz (b and c), 25 °C in 10%  $^2\text{H}_2\text{O}$ , 100 mM  $\text{K}^+$ , 10 mM TE buffer with pH 7 and oligonucleotide concentration of 1.0 mM (a and c).

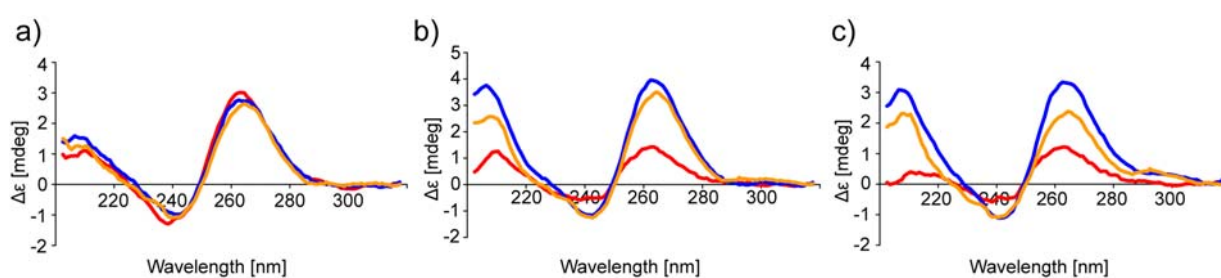

**Figure S3:** CD spectra of a) RNV66, b) RNV70 and c) V7t1 recorded at 25 °C in 10 mM KPi buffer with pH 7 and 5  $\mu\text{M}$  oligonucleotide concentration. Red, blue and orange curves represent CD spectra acquired at 0 mM  $\text{K}^+$ , 50 mM  $\text{K}^+$  and 50 mM  $\text{K}^+$  after annealing, respectively.

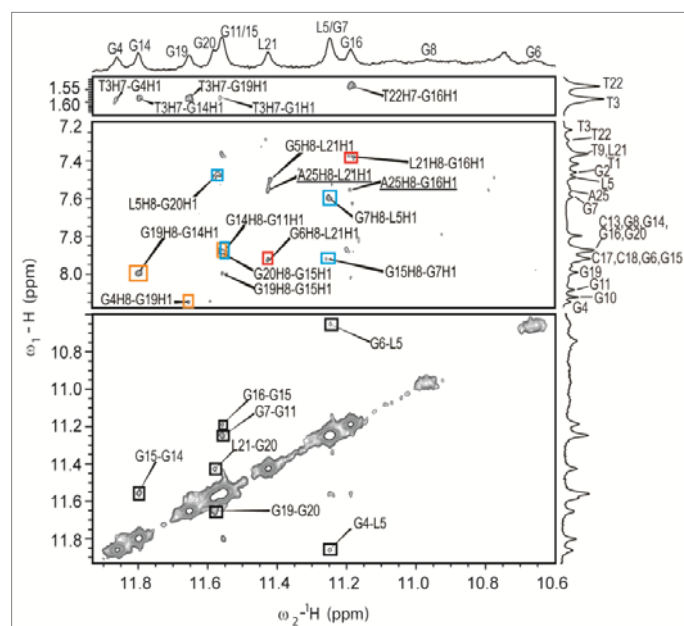

**Figure S4:** Imino-H7, imino-aromatic and imino-imino regions of 2D NOESY spectrum ( $\tau_m = 250$  ms) of RNV66 with resonance assignment indicated along 1D traces. Cross-peaks labelled with red, blue and orange rectangles correspond to NOE interactions between imino and aromatic protons of G6-G8-G16-L21, L5-G7-G15-G20 and G4-G11-G14-G19 quartets, respectively. Cross-peaks labelled with black rectangles indicate connections between sequential residues in the G-quadruplex core. NMR spectrum was recorded at 600 MHz, 0 °C in 10%  $^2\text{H}_2\text{O}$ , 50 mM  $\text{K}^+$ , 10 mM KPi buffer with pH 7 and oligonucleotide concentration of 0.5 mM.

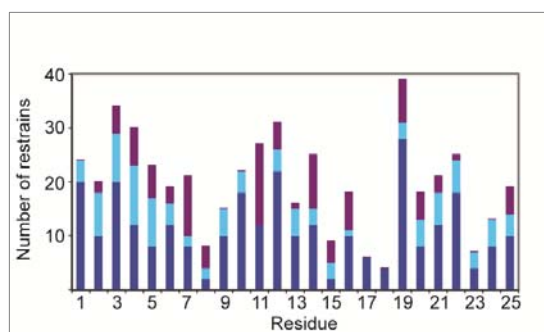

**Figure S5:** Number of restraints per residue used in SA calculations. Intra-residue, sequential and long range restraints are shown in dark blue, light blue and magenta, respectively.

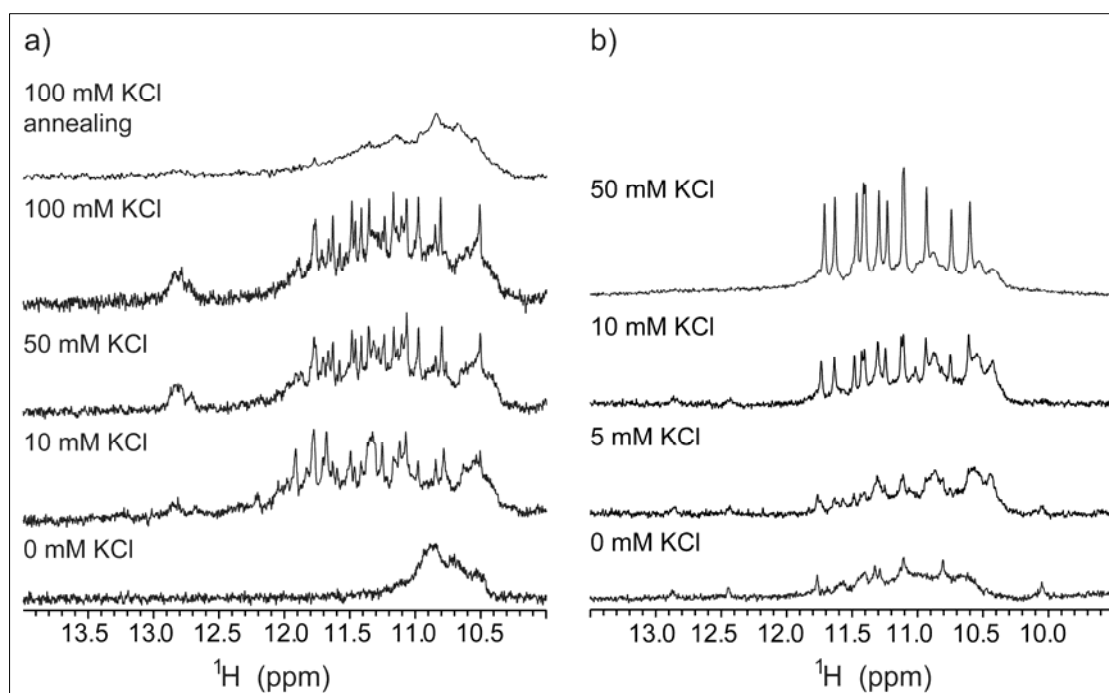

**Figure S6:** The imino region of 1D  $^1\text{H}$  NMR spectra of a) V7t1 and b) RNV70 recorded at different concentrations of  $\text{K}^+$  ions and after slow annealing. Spectra were recorded at 600 MHz, 25 °C in 10%  $^2\text{H}_2\text{O}$ , 10 mM KPi buffer with pH 7 and oligonucleotide concentration of 0.8 (V7t1) and 1 (RNV70) mM.

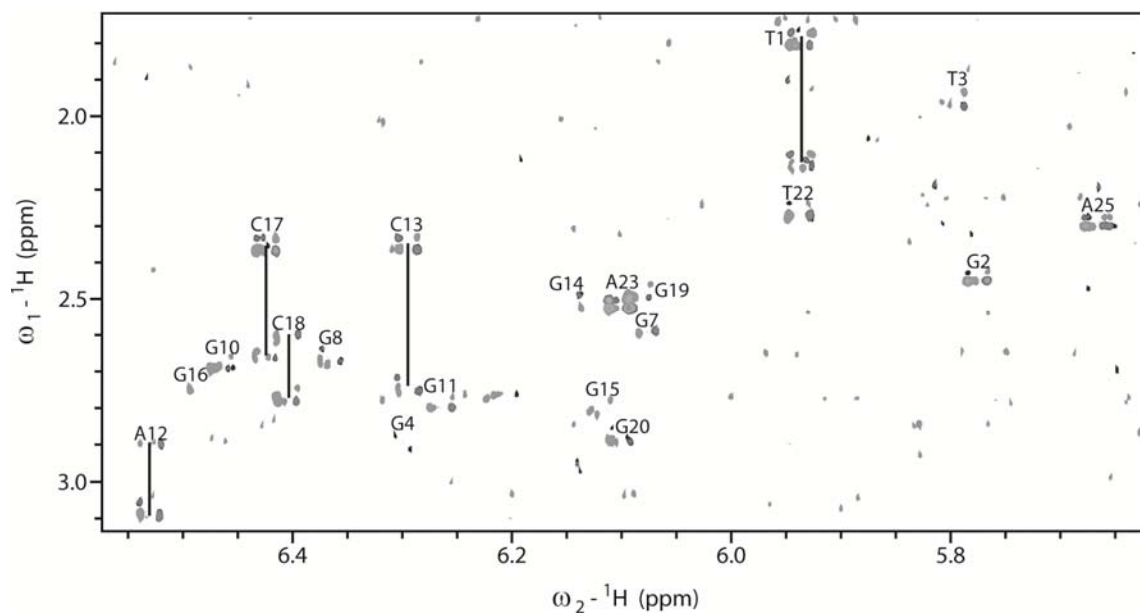

**Figure S7:** 2D DQF- COSY spectrum of RNV66 at 800 MHz, 25 °C in 50 mM K<sup>+</sup>, 10 mM KPi buffer with pH 7 and oligonucleotide concentration of 1 mM.

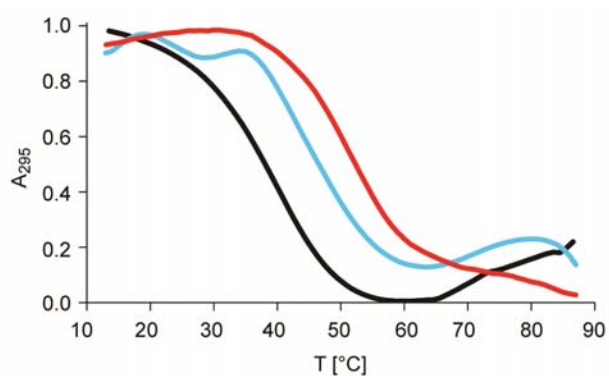

**Figure S8:** UV melting curves of RNV66 (red), RNV70 (blue) and V7t1 (black) recorded in 10 mM KPi buffer with pH 7 and 5  $\mu$ M oligonucleotide concentration.

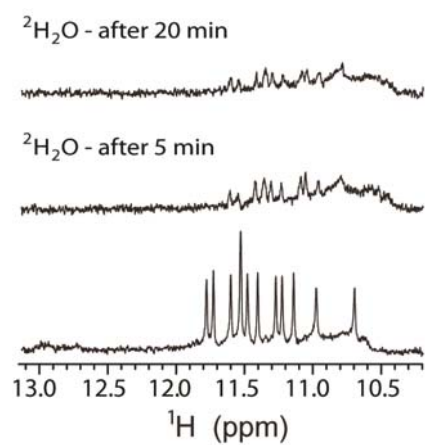

**Figure S9:** The imino region of 1D  $^1\text{H}$  NMR spectra of RNV66 recorded after exchange from  $\text{H}_2\text{O}$  to  $^2\text{H}_2\text{O}$ . Spectra were recorded at 800 MHz, 25 °C in 50 mM  $\text{K}^+$ , 10 mM KPi buffer with pH 7 and oligonucleotide concentration of 1 mM.
